# Supplementary material
Source: PubMed Central journal article supplement (PMC7094983)
Supplement: 41586_2018_10_MOESM2_ESM.pdf [file 41586_2018_10_MOESM2_ESM.pdf]

# SUPPLEMENTARY INFORMATION

**Supplementary Information Table 1 | List of nucleotide variants among the 33 SADS-CoV genomes obtained from the four farms.**

The residues changed relative to that of original Farm A strain (DCD5, 2017/1/11, in yellow) are highlighted in red.

| No.  | Farm         | Date    | 2116 | 2236 | 2955 | 3285 | 10860 | 15395 | 18410 | 20219 | 21139 | 21580 | 21622 | 21985 | 22180 | 26669 |
|------|--------------|---------|------|------|------|------|-------|-------|-------|-------|-------|-------|-------|-------|-------|-------|
| DCD5 | DCD (farm A) | 11/1/17 | c    | g    | t    | g    | t     | c     | t     | t     | t     | t     | c     | g     | c     | c     |
| 31   | DCD (farm A) | 13/1/17 | c    | g    | t    | g    | t     | c     | t     | c     | t     | t     | c     | g     | c     | c     |
| 57   | DCD (farm A) | 5/2/17  | c    | g    | t    | g    | t     | c     | c     | c     | t     | t     | c     | g     | c     | c     |
| DCD6 | DCD (farm A) | 17/2/17 | c    | g    | t    | g    | t     | c     | c     | c     | t     | t     | c     | g     | c     | c     |
| 82   | DCD (farm A) | 22/2/17 | c    | g    | t    | g    | c     | c     | c     | c     | t     | t     | c     | g     | c     | c     |
| A    | DCD (farm A) | 6/3/17  | c    | g    | t    | g    | t     | c     | c     | c     | t     | t     | c     | g     | c     | c     |
| DCD7 | DCD (farm A) | 11/4/17 | c    | g    | t    | g    | t     | c     | c     | c     | t     | t     | c     | g     | c     | c     |
| 202  | DCD (farm A) | 17/4/17 | c    | g    | t    | g    | t     | c     | t     | t     | t     | t     | c     | g     | c     | c     |
| C    | SC (farm B)  | 9/8/16  | c    | g    | t    | g    | t     | c     | t     | t     | t     | t     | c     | g     | c     | c     |
| 34   | SC (farm B)  | 14/1/17 | c    | g    | t    | g    | t     | c     | t     | t     | t     | t     | c     | g     | c     | c     |
| 50   | SC (farm B)  | 22/1/17 | c    | g    | t    | g    | t     | c     | t     | t     | t     | t     | c     | g     | c     | c     |
| 54   | SC (farm B)  | 26/1/17 | c    | g    | c    | g    | t     | c     | t     | t     | t     | t     | c     | g     | c     | c     |
| 250  | SC (farm B)  | 30/5/17 | c    | g    | c    | g    | t     | c     | t     | t     | t     | t     | c     | g     | c     | c     |
| 32   | WT (farm C)  | 13/1/17 | c    | g    | t    | g    | t     | c     | t     | t     | t     | t     | c     | g     | c     | c     |
| 44   | WT (farm C)  | 20/1/17 | c    | g    | t    | g    | t     | c     | t     | t     | t     | t     | c     | g     | c     | c     |
| 89   | WT (farm C)  | 25/2/17 | c    | g    | t    | g    | t     | c     | t     | t     | t     | t     | c     | g     | c     | c     |
| 146  | WT (farm C)  | 24/3/17 | c    | g    | t    | g    | t     | c     | t     | t     | t     | t     | c     | g     | c     | c     |
| 175  | WT (farm C)  | 7/4/17  | c    | g    | t    | g    | t     | c     | t     | t     | c     | c     | c     | g     | c     | t     |
| 182  | WT (farm C)  | 10/4/17 | c    | g    | t    | g    | t     | c     | t     | t     | c     | t     | c     | g     | c     | t     |
| 192  | WT (farm C)  | 14/4/17 | c    | g    | t    | g    | t     | c     | t     | t     | c     | c     | c     | g     | c     | t     |
| 203  | WT (farm C)  | 17/4/17 | c    | g    | t    | g    | t     | c     | t     | t     | c     | c     | c     | g     | c     | t     |
| 211  | WT (farm C)  | 23/4/17 | c    | g    | t    | g    | t     | c     | t     | t     | c     | c     | c     | g     | c     | t     |
| 246  | WT (farm C)  | 26/5/17 | c    | g    | t    | g    | t     | c     | t     | t     | c     | c     | c     | g     | c     | t     |
| 27   | DB (farm D)  | 11/1/17 | c    | g    | t    | g    | t     | c     | t     | t     | t     | t     | c     | g     | c     | c     |
| 53   | DB (farm D)  | 24/1/17 | c    | g    | t    | g    | t     | c     | t     | t     | t     | t     | c     | c     | t     | c     |
| 75   | DB (farm D)  | 18/2/17 | c    | g    | t    | g    | t     | c     | t     | t     | t     | t     | c     | g     | c     | c     |
| 86   | DB (farm D)  | 23/2/17 | c    | g    | t    | g    | t     | c     | t     | t     | t     | t     | c     | g     | c     | c     |
| 188  | DB (farm D)  | 13/4/17 | c    | g    | t    | g    | t     | c     | t     | t     | t     | t     | c     | g     | c     | c     |
| 189  | DB (farm D)  | 13/4/17 | c    | g    | t    | g    | t     | c     | t     | t     | t     | t     | c     | g     | c     | c     |
| 197  | DB (farm D)  | 16/4/17 | c    | g    | t    | t    | t     | t     | t     | t     | t     | t     | a     | g     | c     | c     |
| D    | DB (farm D)  | 18/4/17 | c    | t    | t    | t    | t     | t     | t     | t     | t     | t     | a     | g     | c     | c     |
| 207  | DB (farm D)  | 21/4/17 | t    | g    | t    | t    | t     | t     | t     | t     | t     | t     | a     | g     | c     | c     |

**Supplementary Information Table 2 | List of PCR primers used in this study.**

\*The numbering system of SADS-CoV Farm A (strain DCD5, 2017/1/11, GenBank Accession number MF094681) is used here.

| Gene      | Primer name and location* | Primer sequence       | Purpose       |
|-----------|---------------------------|-----------------------|---------------|
| RdRp gene | SADS-RdRp-F (19512-19531) | GTTGATTGTAAGGCTTGGCG  | qPCR          |
|           | SADS-RdRp-R (19590-19608) | AACCACACTTCCAACCTCAGC |               |
| N gene    | SADS-N-F (25810-25830)    | CTAAAACTAGCCCCACAGGTC | qPCR          |
|           | SADS-N-R (25938-25957)    | TGATTGCGAGAACGAGACTG  |               |
| S gene    | HKU2-S1-1F (20066-20085)  | GGCGCTATGGCTGTTAAGAT  | Amplification |
|           | HKU2-S1-1R (22317-22336)  | CACGAATGTCAGCCTCAACT  |               |
| S gene    | HKU2-S1-2F (20157-20176)  | CCAGTGTCAACACGTCATCT  | Amplification |
|           | HKU2-S1-2R (22218-22238)  | ACGCTGAACTTAGGCATTGTA |               |
